# Supplementary material for: Long Noncoding RNA MALAT1 Controls Cell Cycle Progression by Regulating the Expression of Oncogenic Transcription Factor B-MYB
Source: PLoS Genet. 2013 Mar 21;9(3):e1003368. doi: 10.1371/journal.pgen.1003368 (PMC3605280; doi:10.1371/journal.pgen.1003368)
Supplement: Table S3 — Common genes downregulated (Z-ratio ≥2.50) upon knockdown of MALAT1 with both antisense oligo 1 (AS1) or antisense oligo 2 (AS2) in WI-38 cells. (XLSX) [file pgen.1003368.s011.xlsx]

## Sheet: Sheet1
Suppl. Table 3. Common gene down-regulated (Z-ratio > 2.50) upon knockdown of MALAT1 with both antisense oligo 1 (AS1) or antisense oligo 2 (AS2) in WI38 cells.
SYMBOL
ACLY
ACSL3
ACTL6A
ADD3
ADRM1
AMPH
ANLN
APEH
APOBEC3B
ARHGAP19
ARL6IP1
ARL6IP6
ARSJ
ASPM
ATL1
ATP11C
AURKA
AURKB
B3GALT6
BARD1
BCKDK
BCL2L12
BIRC5
BOP1
BUB1
BUB1B
BUB3
C11orf82
C12orf32
C12orf48
C13orf3
C14orf106
C14orf80
C15orf23
C17orf58
C18orf54
C19orf60
C1orf112
C2orf34
C3orf14
C3orf59
C5orf13
C6orf173
CAV1
CBX5
CCDC109B
CCDC15
CCDC5
CCDC71
CCDC77
CCDC80
CCL2
CCNA2
CCNB1
CCNB2
CCNF
CD47
CDC2
CDC20
CDC25A
CDC25B
CDC25C
CDC45L
CDCA2
CDCA3
CDCA4
CDCA5
CDCA7
CDCA8
CDKN3
CDT1
CENPA
CENPE
CENPF
CENPK
CENPM
CENPN
CEP55
CHN1
CHST15
CKAP2
CKAP2L
CKB
CKS1B
CKS2
CLDN11
CNKSR3
COL1A2
COL3A1
DBI
DBNL
DCBLD2
DEPDC1
DHCR24
DIAPH3
DLGAP5
DNAJC9
DPYSL3
DTD1
DTL
DUT
E2F2
ECT2
EGR1
EHBP1
ELF3
EMG1
ENPP1
ERCC1
ERCC6L
EVL
EXO1
EXOSC3
FABP5
FABP5L2
FAM125A
FAM173A
FAM36A
FAM64A
FAM83D
FANCG
FANCI
FAR1
FBXO5
FEN1
FGF5
FOS
FOSB
FOXM1
FUT8
FZD7
G3BP1
GAS2L3
GBP1
GBP2
GINS2
GINS3
GINS4
GLCE
GLIPR2
GMNN
GMPPB
GTSE1
H2AFX
H2AFY2
HAUS8
HDAC2
HEATR1
HIRIP3
HIST1H4C
HJURP
HLTF
HMGB1L1
HMGB2
HMGN2
HMMR
HNRNPA0
HNRNPAB
HNRNPL
HSPA5
HYOU1
IDH1
IDH2
IDI1
IFNAR1
ILF2
ILF3
INSIG1
KATNB1
KCNK2
KCNMA1
KIAA0101
KIAA0363
KIAA1618
KIF11
KIF14
KIF20A
KIF20B
KIF22
KIF23
KIF2A
KIF2C
KIF4A
KIFC1
KPNA2
KRTAP1-5
LANCL1
LHFP
LIG1
LIG3
LMNB1
LMNB2
LOC100128007
LOC100128892
LOC100129585
LOC100130561
LOC100130932
LOC100131735
LOC100132863
LOC143543
LOC148915
LOC399942
LOC401805
LOC440093
LOC441484
LOC442727
LOC642956
LOC643287
LOC644101
LOC645251
LOC646993
LOC647000
LOC648822
LOC649679
LOC653377
LOC653874
LOC727803
LOC728026
LOC728873
LOC729505
LOC729687
LOC729816
LOC729964
LOC730534
LOC730994
LOC731314
LOC92755
LOXL1
LPCAT3
MAD2L1
MAP1B
MARCKSL1
MCM10
MCM3
MCM4
MCM6
MCM7
MED20
MELK
METTL1
MEX3D
MFSD3
MGC39900
MGC40489
MIR1228
MIR586
MRPL12
MRPL39
MSRA
MT1X
MTX1
MYH10
MYO1C
NCAPD2
NCAPG
NCAPG2
NDC80
NDRG4
NEK2
NETO2
NLGN1
NPTX1
NRGN
NT5DC2
NUBP1
NUDT1
NUDT15
NUF2
NUP107
NUP37
NUP88
NUSAP1
OIP5
ORC6L
OSR1
PAFAH1B1
PAQR4
PARP1
PBK
PCDH7
PDCD6IP
PDLIM7
PEG10
PFKL
PHF19
PIGQ
PKD2
PLK1
PLK4
POLA2
POLE2
POLR3G
POP5
PPARG
PPP2R1B
PPP2R5C
PRC1
PRIM1
PRMT1
PRR11
PRRT3
PSIP1
PSMA4
PSRC1
PTRH1
PTTG1
PTTG3P
PTX3
PXMP2
RACGAP1
RAD21
RAD51AP1
RANBP1
RASA1
RBM12
RBMX
RFC3
RFC4
RFC5
RFXANK
RGS20
RNASEH2A
RNF145
RPL10A
RPL29
RPS7
RRM1
RRM2
RRP7A
SC4MOL
SCD
SERBP1
SGOL2
SKA1
SKIV2L2
SKP2
SLC25A10
SLC4A7
SLC7A14
SLFN11
SLIT2
SMARCC2
SMC2
SMC4
SNCAIP
SNORD96A
SNRPA
SOCS1
SOX11
SPC24
SPC25
SPG3A
SPIN4
SREBF1
SRP54
SSBP4
STIL
STMN1
SUV39H1
TACC3
TAF9L
TAX1BP3
TEAD2
TGM2
THOC2
THOC4
TIMELESS
TK1
TMEFF2
TMEM16D
TMEM30A
TMPO
TMSB15A
TOP2A
TOP2B
TOR3A
TPM3
TPX2
TRIOBP
TRIP13
TRMT5
TTK
TUBA1A
TUBA3D
TUBB
TUBB2B
TUBB2C
TUBB3
TUBB4Q
TUBG1
TWIST2
TYMS
UBE2C
UBE2E3
UBE2T
UHRF1
USP1
USP9X
VPS13A
VPS24
VRK1
WASPIP
WDR51A
WDR54
XRCC5
ZBTB42
ZFP36
ZNF207
ZNF22
ZWINT
